# Supplementary material
Source: publisher figshare collection journal article supplement (https://acs.figshare.com/ndownloader/files/13086590)
Supplement: Supplementary file 1 [file 13086590]

## Supplementary information

# Atomic Layer Deposition of Cobalt Using H<sub>2</sub>-, N<sub>2</sub>- and NH<sub>3</sub>-based Plasmas: On the Role of the Co-reactant

*Martijn F. J. Vos<sup>1</sup>, Gerben van Straaten<sup>1</sup>, W.M.M. (Erwin) Kessels<sup>1</sup> and Adriaan J.M. Mackus<sup>1,\*</sup>*

<sup>1</sup>Department of Applied Physics, Eindhoven University of Technology, P.O. Box 513, 5600 MB Eindhoven, The Netherlands

\*E-mail: [a.j.m.mackus@tue.nl](mailto:a.j.m.mackus@tue.nl)

## Metals and metal nitrides deposited using NH<sub>3</sub> and H<sub>2</sub>/N<sub>2</sub> plasmas

**Table S1.** List of selected metals and metal nitrides which have been deposited using NH<sub>3</sub> plasma and/or H<sub>2</sub>/N<sub>2</sub> plasma as co-reactant. The third column indicates whether the use of NH<sub>3</sub> and/or H<sub>2</sub>/N<sub>2</sub> plasma resulted in a metal or metal nitride film. In addition the reduction potential E<sup>0</sup> of the corresponding element is listed.<sup>2</sup> As the reduction potential decreases, C, O, and N incorporation (and therefore metal nitride deposition) become more likely. In general, the use of a NH<sub>3</sub> or H<sub>2</sub>/N<sub>2</sub> plasma yields metal deposition for reduction potentials of ~ -0.3 and above, while for elements below Co a metal nitride film is obtained. Note that W and Mo do not follow the trend based on the reduction potential. W and Mo are however reported to be very prone to nitridation and their nitrides are stable.<sup>1</sup>

| Element | Reported co-reactant(s)                          | Reported state | Reference | E <sup>0</sup> (eV) |
|---------|--------------------------------------------------|----------------|-----------|---------------------|
| Pt      | NH <sub>3</sub>                                  | metal          | 3         | 1.180               |
| Ir      | NH <sub>3</sub>                                  | metal          | 4         | 1.156               |
| Pd      | H <sub>2</sub> /N <sub>2</sub>                   | metal          | 5         | 0.951               |
| Ag      | NH <sub>3</sub>                                  | metal          | 6         | 0.800               |
| Ru      | NH <sub>3</sub> & H <sub>2</sub> /N <sub>2</sub> | metal          | 7,8       | 0.455               |
| Ni      | NH <sub>3</sub>                                  | metal          | 9         | -0.257              |
| Co      | NH <sub>3</sub> & H <sub>2</sub> /N <sub>2</sub> | metal          | 10–12     | -0.280              |
| W       | NH <sub>3</sub> & H <sub>2</sub> /N <sub>2</sub> | nitride        | 13        | 0.100               |
| Mo      | H <sub>2</sub> /N <sub>2</sub>                   | nitride        | 14        | -0.200              |
| In      | H <sub>2</sub> /N <sub>2</sub>                   | nitride        | 15        | -0.338              |
| Ga      | NH <sub>3</sub> & H <sub>2</sub> /N <sub>2</sub> | nitride        | 15,16     | -0.549              |
| Ta      | NH <sub>3</sub> & H <sub>2</sub> /N <sub>2</sub> | nitride        | 17–19     | -0.600              |
| Nb      | NH <sub>3</sub> & H <sub>2</sub> /N <sub>2</sub> | nitride        | 20,21     | -1.100              |
| Ti      | NH <sub>3</sub> & H <sub>2</sub> /N <sub>2</sub> | nitride        | 22,23     | -1.163              |
| Hf      | H <sub>2</sub> /N <sub>2</sub>                   | nitride        | 24        | -1.550              |
| Al      | NH <sub>3</sub> & H <sub>2</sub> /N <sub>2</sub> | nitride        | 16,25     | -1.662              |

## ALD behavior

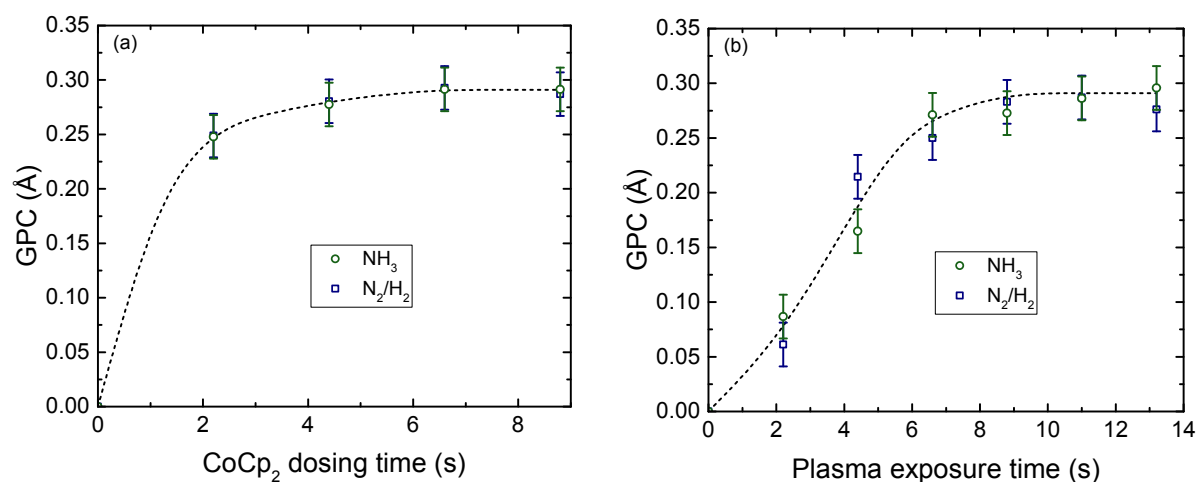

**Figure S1.** Growth per cycle (GPC) as a function of (a) CoCp<sub>2</sub> dosing time and (b) plasma exposure time for the AB-NH<sub>3</sub>- and the AB-H<sub>2</sub>/N<sub>2</sub> processes, plotted in the same graphs. The default CoCp<sub>2</sub> dosing time and plasma exposure time were 6 s and 10 s, respectively. The lines serve as guides to the eye. The saturation curves for the two processes look very similar and the GPC in saturation is approximately the same ( $0.29 \pm 0.02$  Å). The precursor dosing time shows saturation after roughly 5 s, and a plasma exposure time of 9 s is needed to reach saturation.

## Procedure for time-resolved quadrupole mass spectrometry measurements

To be able to differentiate between signals caused by reaction products from signals caused by species present due to either the precursor dosing, source gasses, or plasma ignition, different types of cycles were used. These three different cycles were: a ‘normal’ ALD cycle, a cycle without precursor dosing and a cycle without igniting the plasma(s). See Figure S2 for schematics of the three different cycles.

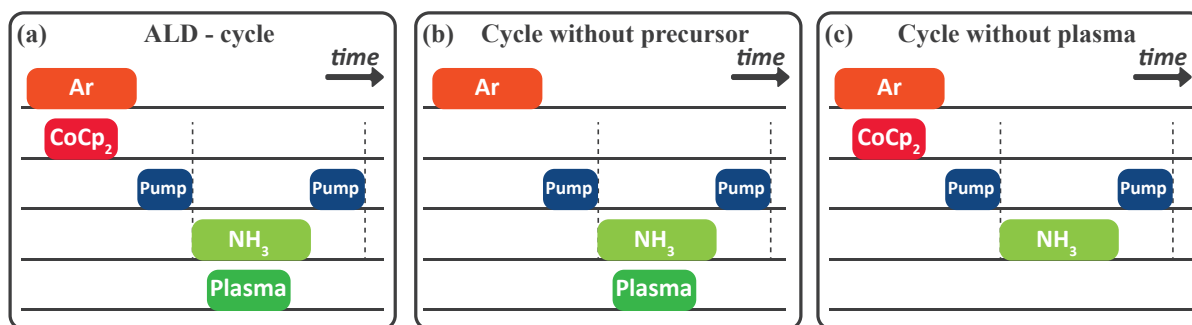

**Figure S2.** Schematic illustrations showing the three different cycles that were used for the QMS studies for the case of the AB-NH<sub>3</sub> process.

The three different sets of cycles were performed sequentially. Fig. S3 shows an example of the raw data that is collected by this procedure. As can be seen, every set of ten ALD cycles was preceded by plasma cleaning steps or a ‘plasma reset’. This plasma reset consisted of a 90 s O<sub>2</sub> plasma (to remove contamination from the reactor wall), a reducing NH<sub>3</sub> plasma for 120 s, and a final pump step of 60 s. For each set of ten cycles, the signal over the last nine was averaged, since the first cycle was typically affected by the plasma reset.

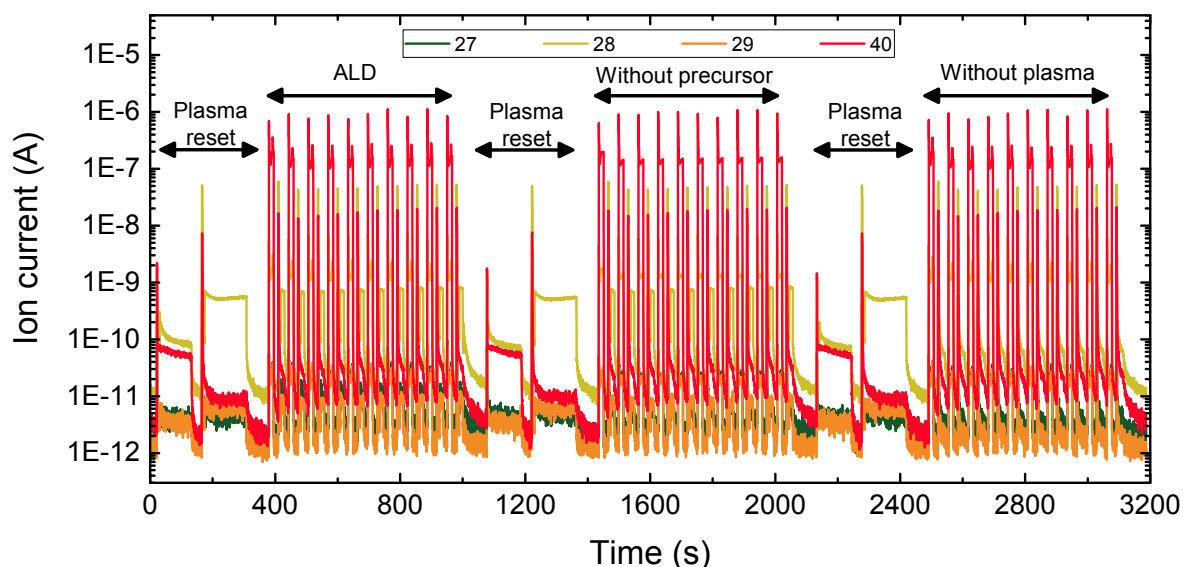

**Figure S3.** Raw QMS data collected for four different  $m/z$  ratios (27, 28, 29 and 40, see legend). Three different sets of cycles were performed, separated from each other by plasma resets.

### Assignment of species to $m/z$ ratios

**Table S2.**  $m/z$  ratios, their assigned ions and their (main) assigned parent molecules. The assignments are based on cracking patterns taken from the NIST database.

| $m/z$ | Assigned ion(s)                          | Assigned parent species                                        | $m/z$ | Assigned ion(s)                                                                | Assigned parent species                                                                                          |
|-------|------------------------------------------|----------------------------------------------------------------|-------|--------------------------------------------------------------------------------|------------------------------------------------------------------------------------------------------------------|
| 2     | $\text{H}_2^+$                           | $\text{H}_2$                                                   | 27    | $\text{C}_2\text{H}_3^+$ , $\text{HCN}^+$                                      | $\text{C}_2\text{H}_4$ , $\text{C}_5\text{H}_6$ , $\text{HCN}$                                                   |
| 12    | $\text{C}^+$                             | $\text{HCN}$                                                   | 28    | $\text{N}_2^+$ , $\text{C}_2\text{H}_4^+$                                      | $\text{N}_2$ , $\text{C}_2\text{H}_4$                                                                            |
| 13    | $\text{CH}^+$                            | $\text{HCN}$                                                   | 39    | $\text{C}_3\text{H}_3^+$ , $\text{C}_2\text{HN}^+$                             | $\text{C}_5\text{H}_6$ , $\text{C}_3\text{H}_4$ ,<br>$\text{Co}(\text{C}_5\text{H}_5)_2$ , $\text{C}_2\text{HN}$ |
| 14    | $\text{N}^+$                             | $\text{N}_2$ , $\text{NH}_3$                                   | 40    | $\text{Ar}^+$ , $\text{C}_3\text{H}_4^+$ ,<br>$\text{C}_2\text{H}_2\text{N}^+$ | $\text{Ar}$ , $\text{C}_3\text{H}_4$ ,<br>$\text{C}_5\text{H}_6$ , $\text{C}_2\text{H}_2\text{N}$                |
| 15    | $\text{NH}^+$                            | $\text{NH}_3$                                                  | 59    | $\text{Co}^+$                                                                  | $\text{Co}(\text{C}_5\text{H}_5)_2$                                                                              |
| 16    | $\text{NH}_2^+$                          | $\text{NH}_3$                                                  | 65    | $\text{C}_5\text{H}_5^+$                                                       | $\text{C}_5\text{H}_6$ , $\text{Co}(\text{C}_5\text{H}_5)_2$                                                     |
| 17    | $\text{NH}_3^+$                          | $\text{NH}_3$                                                  | 66    | $\text{C}_5\text{H}_6^+$                                                       | $\text{C}_5\text{H}_6$ , $\text{Co}(\text{C}_5\text{H}_5)_2$                                                     |
| 18    | $\text{H}_2\text{O}^+$ , $\text{NH}_4^+$ | $\text{H}_2\text{O}$ , $\text{NH}_3$                           | 98    | $\text{CoC}_3\text{H}_3^+$                                                     | $\text{Co}(\text{C}_5\text{H}_5)_2$                                                                              |
| 24    | $\text{C}_2^+$                           | $\text{C}_2\text{H}_4$ , $\text{C}_5\text{H}_6$                | 124   | $\text{Co}(\text{C}_5\text{H}_5)^+$                                            | $\text{Co}(\text{C}_5\text{H}_5)_2$                                                                              |
| 25    | $\text{C}_2\text{H}^+$                   | $\text{C}_2\text{H}_4$ , $\text{C}_5\text{H}_6$                | 189   | $\text{Co}(\text{C}_5\text{H}_5)_2^+$                                          | $\text{Co}(\text{C}_5\text{H}_5)_2$                                                                              |
| 26    | $\text{C}_2\text{H}_2^+$ , $\text{CN}^+$ | $\text{C}_2\text{H}_4$ , $\text{C}_5\text{H}_6$ , $\text{HCN}$ |       |                                                                                |                                                                                                                  |

## Comparison NH<sub>3</sub> and H<sub>2</sub>/N<sub>2</sub> plasma

### QMS spectra

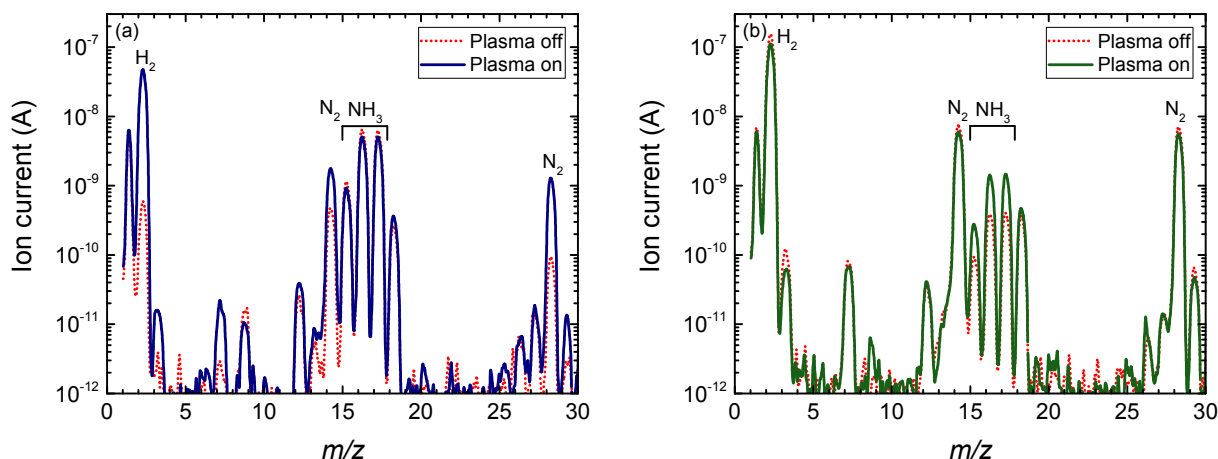

**Figure S4.** QMS mass spectra for (a) NH<sub>3</sub> and (b) H<sub>2</sub>/N<sub>2</sub>, gas and plasma. The spectra were collected for the source gas only ('plasma off', dashed line) and after plasma ignition ('plasma on', solid line). Comparison of the two spectra in (a) indicates that part of the NH<sub>3</sub> is dissociated upon plasma ignition, leading to formation of N<sub>2</sub> ( $m/z = 14$  and  $28$ ) and H<sub>2</sub> ( $m/z = 1$  and  $2$ ). On the contrary, (b) shows that part of the H<sub>2</sub> and N<sub>2</sub> in the H<sub>2</sub>/N<sub>2</sub> plasma is consumed, leading to the formation of NH<sub>3</sub>, as revealed by the increase in ion current for  $m/z$  ratios 15-17.

### OES spectra

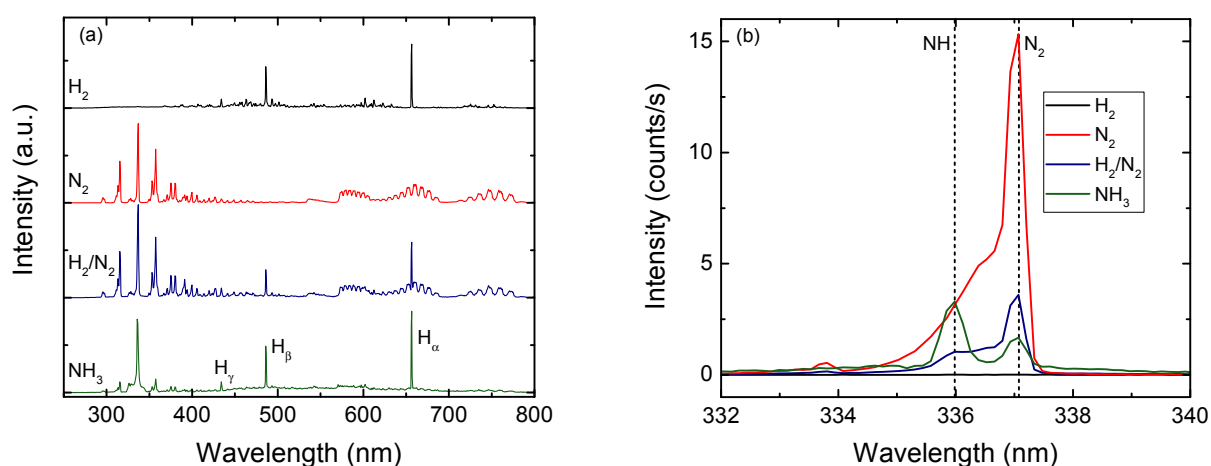

**Figure S5.** Optical emission spectra for H<sub>2</sub>, N<sub>2</sub>, H<sub>2</sub>/N<sub>2</sub> and NH<sub>3</sub> plasmas over the wavelength range of (a) 280 nm – 800 nm and (b) 332 nm – 340 nm. The emission spectra for the NH<sub>3</sub> and H<sub>2</sub>/N<sub>2</sub> plasmas are very similar. (a) The spectra have been scaled and offset for clarity. (b) An emission line for excited NH can be seen at  $\sim 336$  nm in the spectra for both plasmas, indicating that NH <sub>$x$</sub> ,  $x < 3$  radical species are present.

## QMS precursor half-cycle

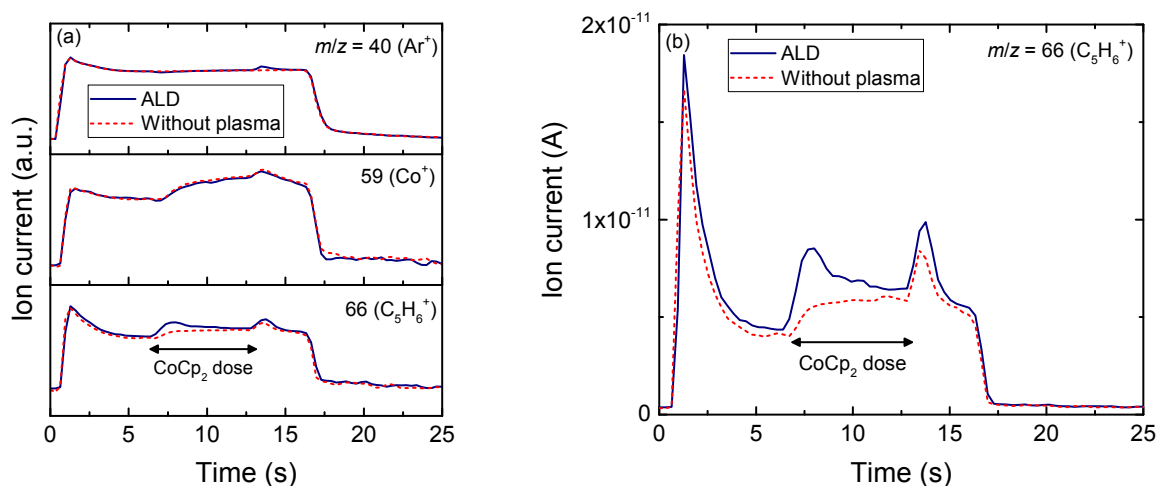

**Figure S6.** (a) Time-resolved QMS signals for  $m/z$  ratios 40 ( $\text{Ar}^+$ ), 59 ( $\text{Co}^+$ ) and 66 ( $\text{C}_5\text{H}_6^+$ ), collected during the precursor sub-cycle of the AB- $\text{NH}_3$  process, plotted on a logarithmic vertical scale. (b) The QMS signal for  $m/z = 66$ , plotted using a linear vertical scale. QMS measurements were done for the normal ALD cycle, and for a reference cycle without igniting the plasma, both using a  $\text{CoCp}_2$  dose of 6 s. Comparing the two signals gives insight into which species are formed as a consequence of the ALD reactions. Note that the Ar carrier gas is diverted before sending it through the  $\text{CoCp}_2$  bubbler in order to stabilize the gas flow. This leads to an increase in chamber pressure, which explains the initial increase in ion currents just after  $t = 0$ . After the Ar starts flowing through the bubbler at around 7 s (indicated with an arrow in the figure), the ion currents for  $m/z$  ratios 59 and 66 increase, related to  $\text{Co}^+$  and  $\text{HCp}^+$  ( $\text{C}_5\text{H}_6^+$ ), respectively. Subsequently changing the Ar gas flow from the bubbler to the purge line at  $t = 13$  s leads to a pressure spike, accompanied by a peak in the ion currents. During the ‘normal’ ALD cycle the increase at  $t = 7$  s for  $m/z = 66$  is significantly higher than for the reference cycle without plasma exposure (note that the vertical scale is logarithmic in (a)). This difference in ion current suggests that  $\text{HCp}$  is released when the precursor molecule chemisorbs to the surface. Note that similar QMS measurements for the AB- $\text{H}_2/\text{N}_2$  process also revealed the release of  $\text{HCp}$  during precursor dosing, suggesting a similar reaction mechanism.

## QMS cracking patterns

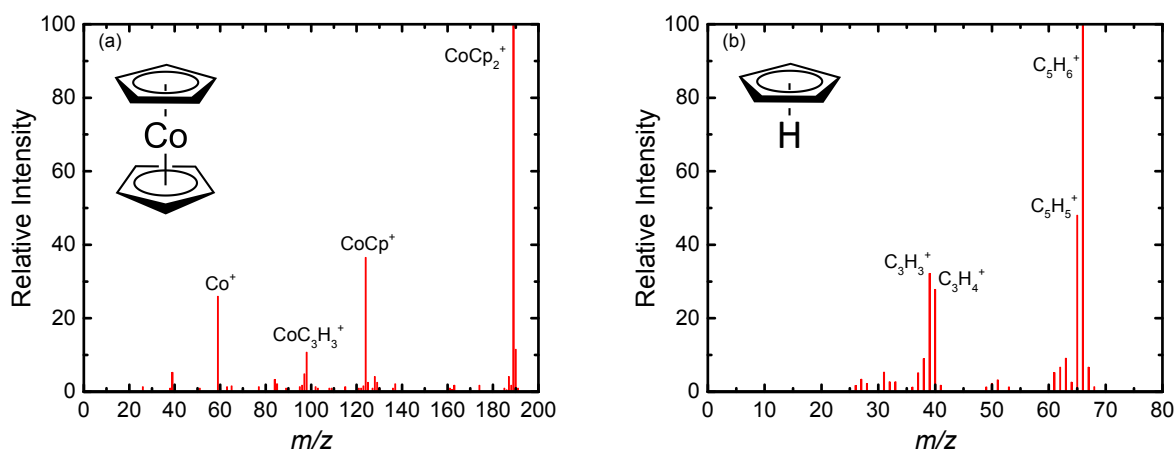

**Figure S7.** QMS cracking patterns for (a)  $\text{CoCp}_2$  and (b)  $\text{HCp}$ , both taken from the NIST database. The cracking pattern for  $\text{CoCp}_2$  is dominated by signals at  $m/z = 59$  ( $\text{Co}$ ), 124 ( $\text{CoCp}$ ) and 189 ( $\text{CoCp}_2$ ). Signals at 39, 40, 65 and 66 are the main contributions in case of  $\text{HCp}$ .

## X-ray photoelectron spectroscopy

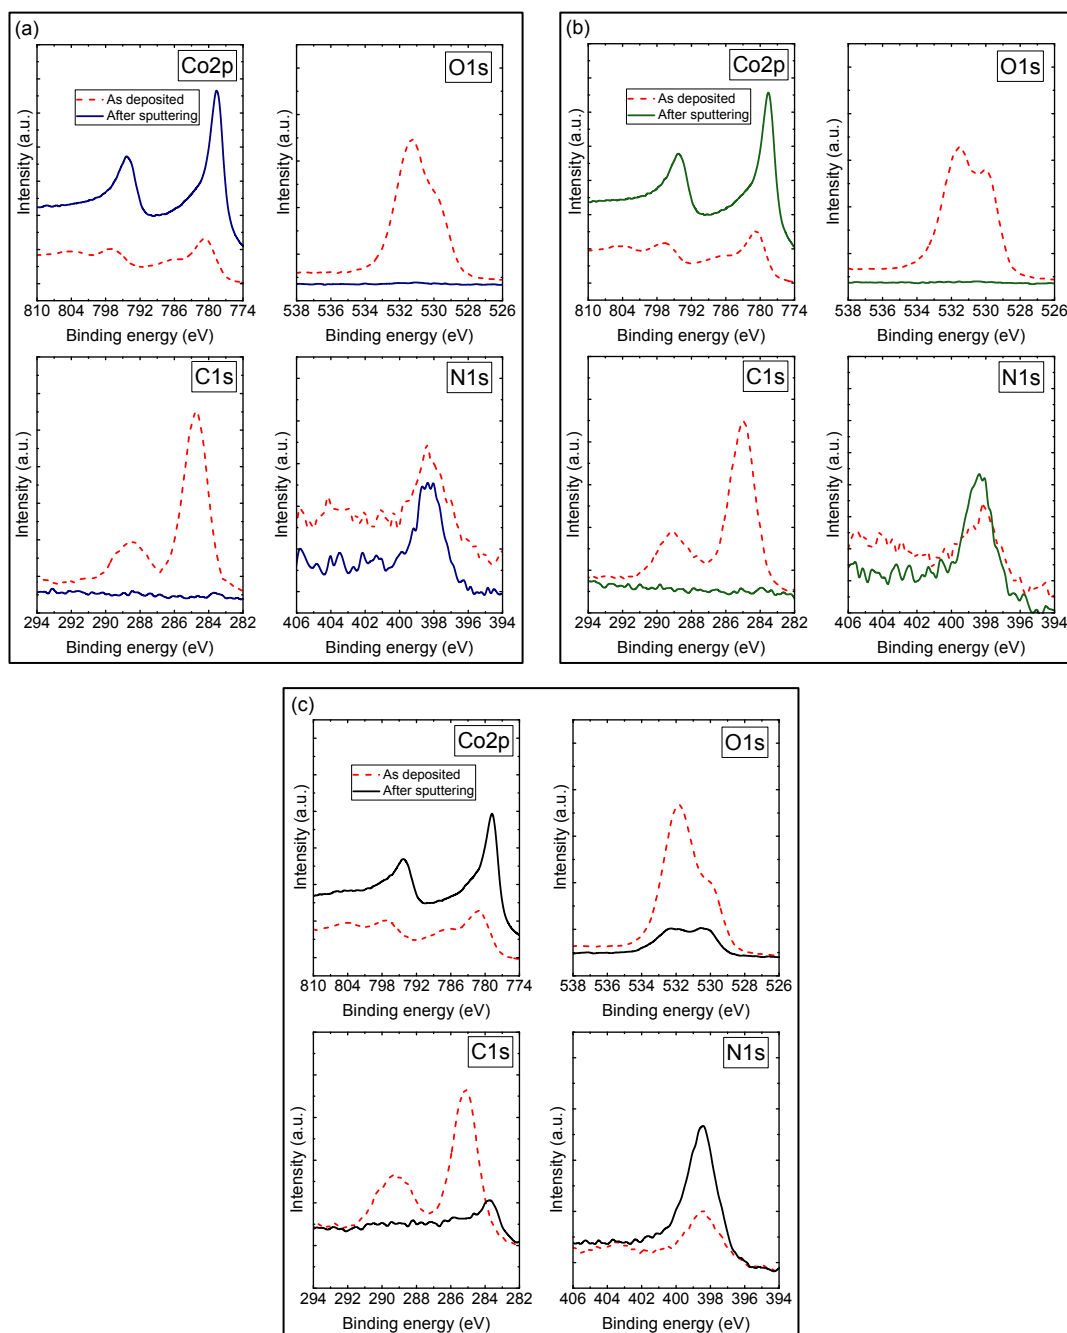

**Figure S8.** XPS spectra for the Co2p, O1s, C1s and N1s peaks for Co films deposited using the (a) AB-NH<sub>3</sub> process, (b) the AB-H<sub>2</sub>/N<sub>2</sub> process and (c) the ABC-N<sub>2</sub>-H<sub>2</sub> process. 1000 cycles were performed for all samples. 6 minutes Ar<sup>+</sup> sputtering was applied to remove the surface contamination. The films deposited using the AB-NH<sub>3</sub>- and AB-H<sub>2</sub>/N<sub>2</sub> processes contain small amounts of impurities, while the film deposited using the ABC-N<sub>2</sub>-H<sub>2</sub> process is significantly contaminated with O, C and N. The surface of the films is slightly oxidized. However, the metallic Co2p peaks is visible around 780.2 eV after Ar<sup>+</sup> sputtering, for the films deposited using the AB-processes.

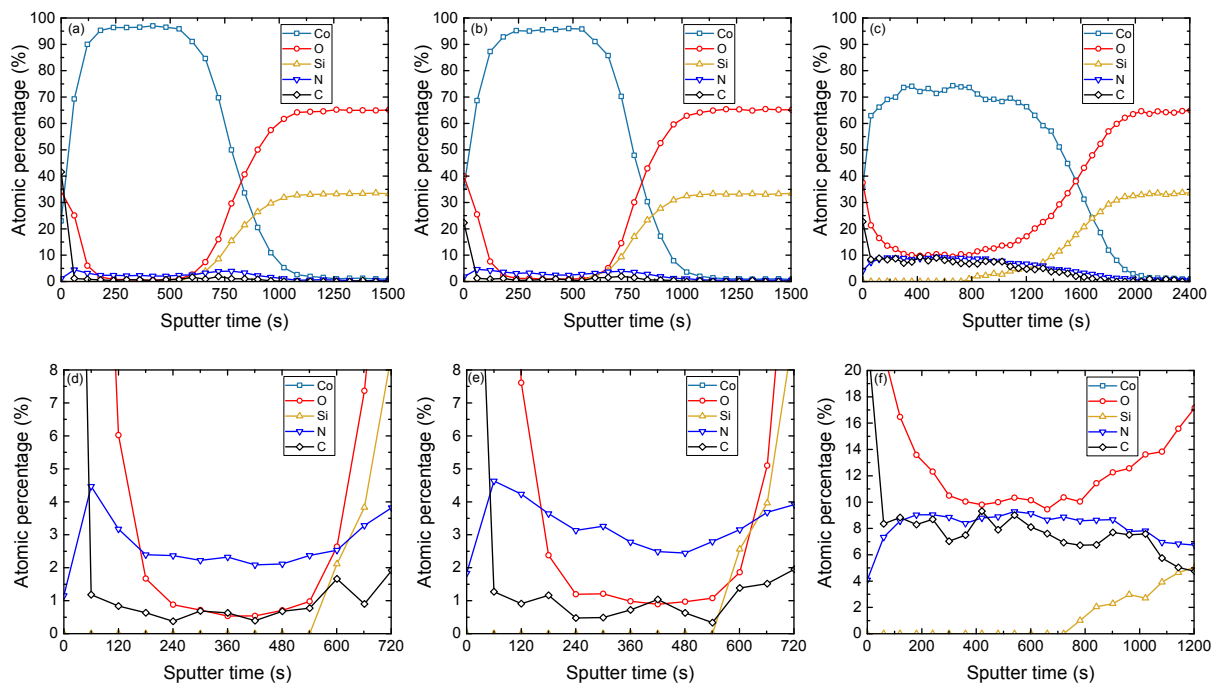

**Figure S9.** XPS depth profiles for Co films deposited using (a, d) the AB-NH<sub>3</sub> process, (b, e) the AB-H<sub>2</sub>/N<sub>2</sub> process and (c, f) the ABC-N<sub>2</sub>-H<sub>2</sub> process. 1000 cycles were performed for all samples. (e - f) show the impurity contents (O, N and C) in more detail. For the AB-NH<sub>3</sub> process and the AB-H<sub>2</sub>/N<sub>2</sub> process the N-content is slightly higher in the subsurface region (~4.5 at.% as compared to ~2.5 at.%), suggesting that N species (e.g. NH<sub>y</sub>) are more stable on the surface than in the bulk. Moreover, the trend of the N-content corroborates the out diffusion of N.

**Table S3.** Material properties of Co films for the ABC-processes as determined from SE, four-point probe and XPS. Two different three-step processes were used, an ABC-cycle with the N<sub>2</sub> plasma first, followed by the H<sub>2</sub> plasma and an ABC-cycle with the H<sub>2</sub> plasma first followed by the N<sub>2</sub> plasma. The impurity contents were determined using XPS after sputtering with Ar<sup>+</sup> for 6 min.

| ALD Process                           | Cycles | d (nm) | $\rho$ ( $\mu\Omega\cdot\text{cm}$ ) | [O] (at.%) | [N] (at.%) | [C] (at.%) |
|---------------------------------------|--------|--------|--------------------------------------|------------|------------|------------|
| ABC - N <sub>2</sub> - H <sub>2</sub> | 1000   | 44     | $1 \times 10^3$                      | 10.1       | 8.4        | 7.2        |
| ABC - H <sub>2</sub> - N <sub>2</sub> | 350    | 28     | $7 \times 10^3$                      | 8.9        | 8.5        | 7.8        |



## Ion current as a function of H<sub>2</sub>/N<sub>2</sub> mixing ratio

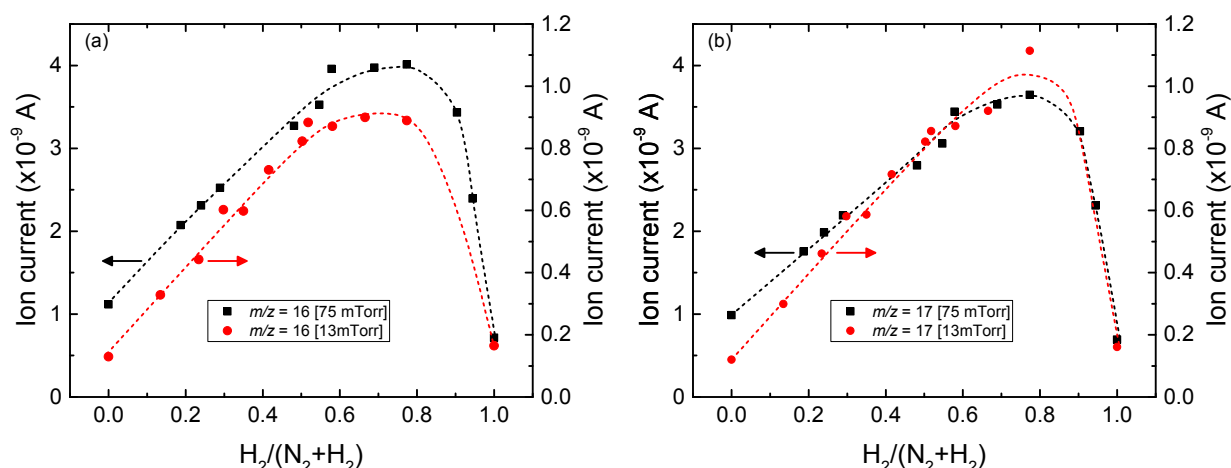

**Figure S10.** QMS ion current at (a)  $m/z$  ratio 16 and (b)  $m/z$  ratio 17 as a function of H<sub>2</sub> fraction in the H<sub>2</sub>/N<sub>2</sub> gas mixture, for a pressure of 13 mTorr and 75 mTorr. The ion currents at  $m/z$  ratios 16 and 17 are measures for the NH<sub>3</sub> content in the H<sub>2</sub>/N<sub>2</sub> plasma. The lines are guides to the eye. Due to the low gas flows used for a pressure of 13 mTorr, it is not possible to keep the pressure constant for mixing ratios higher than ~80 Vol.%. As mentioned in the main text, adding N<sub>2</sub> gas to the H<sub>2</sub> gas increases the pumping speed, thereby changing the total pressure. This makes obtaining certain mixing ratios for a constant total pressure not straightforward. However, the similarities between the trends for the two different pressures confirm that the optimum in the NH<sub>3</sub> production corresponds to 70 Vol.% - 80 Vol.% H<sub>2</sub>, both at 13 mTorr and 75 mTorr. The data for 75 mTorr is also shown in the main text in Figure 3.

## References

- (1) Wang, T.; Yan, Z.; Michel, C.; Pera-Titus, M.; Sautet, P. Trends and Control in the Nitridation of Transition-Metal Surfaces. *ACS Catal.* **2018**, *8*, 63–68.
- (2) Rumble, J. R. *CRC Handbook of Chemistry and Physics*, 98th Editi.; CRC-Press: Boca Raton, FL, 2017.
- (3) Longrie, D.; Devloo-Casier, K.; Deduytsche, D.; Van den Berghe, S.; Driesen, K.; Detavernier, C. Plasma-Enhanced ALD of Platinum with O<sub>2</sub>, N<sub>2</sub> and NH<sub>3</sub> Plasmas. *Ecs J. Solid State Sci. Technol.* **2012**, *1*, Q123–Q129.
- (4) Kim, S.-W.; Kwon, S.-H.; Jeong, S.-J.; Park, J.-S.; Kang, S.-W. Improvement of Morphological Stability of PEALD-Iridium Thin Films by Adopting Two-Step Annealing Process. *Electrochem. Solid-State Lett.* **2008**, *11*, H303.
- (5) Ten Eyck, G. A.; Pimanpang, S.; Juneja, J. S.; Bakhru, H.; Lu, T. M.; Wang, G. C. Plasma-Enhanced Atomic Layer Deposition of Palladium on a Polymer Substrate. *Chem. Vap. Depos.* **2007**, *13*, 307–311.
- (6) Minjauw, M. M.; Solano, E.; Sree, S. P.; Asapu, R.; Van Daele, M.; Ramachandran, R. K.; Heremans, G.; Verbruggen, S. W.; Lenaerts, S.; Martens, J. A.; et al. Plasma-Enhanced Atomic Layer Deposition of Silver Using Ag(Fod)(PEt<sub>3</sub>) and NH<sub>3</sub>-Plasma. *Chem. Mater.* **2017**, *29*, 7114–7121.

- (7) Xie, Q.; Jiang, Y. L.; Musschoot, J.; Deduytsche, D.; Detavernier, C.; Van Meirhaeghe, R. L.; Van den Berghe, S.; Ru, G. P.; Li, B. Z.; Qu, X. P. Ru Thin Film Grown on TaN by Plasma Enhanced Atomic Layer Deposition. *Thin Solid Films* **2009**, *517*, 4689–4693.
- (8) Hong, T. E.; Mun, K.; Choi, S.; Park, J.; Kim, S.-H.; Cheon, T.; Kim, W. K.; Lim, B.; Kim, S. Atomic Layer Deposition of Ru Thin Film Using N<sub>2</sub>/H<sub>2</sub> Plasma as a Reactant. *Thin Solid Films* **2012**, *520*, 6100–6105.
- (9) Lee, H. B. R.; Bang, S. H.; Kim, W. H.; Gu, G. H.; Lee, Y. K.; Chung, T. M.; Kim, C. G.; Park, C. G.; Kim, H. Plasma-Enhanced Atomic Layer Deposition of Ni. *Jpn. J. Appl. Phys.* **2010**, *49*.
- (10) Lee, H.-B.-R.; Kim, H. High-Quality Cobalt Thin Films by Plasma-Enhanced Atomic Layer Deposition. *Electrochem. Solid-State Lett.* **2006**, *9*, G323.
- (11) Yoon, J.; Lee, H.-B.-R.; Kim, D.; Cheon, T.; Kim, S.-H.; Kim, H. Atomic Layer Deposition of Co Using N<sub>2</sub>/H<sub>2</sub> Plasma as a Reactant. *J. Electrochem. Soc.* **2011**, *158*, H1179.
- (12) Park, J.; Lee, H. B. R.; Kim, D.; Yoon, J.; Lansalot, C.; Gatineau, J.; Chevrel, H.; Kim, H. Plasma-Enhanced Atomic Layer Deposition of Co Using Co(MeCp)<sub>2</sub> Precursor. *J. Energ. Chem.* **2013**, *22*, 403–407.
- (13) Sowa, M. J.; Yemane, Y.; Prinz, F. B.; Provine, J. Plasma-Enhanced Atomic Layer Deposition of Tungsten Nitride. *J. Vac. Sci. Technol. A Vacuum, Surfaces, Film.* **2016**, *34*, 051516.
- (14) Bertuch, A.; Keller, B. D.; Ferralis, N.; Grossman, J. C.; Sundaram, G. Plasma Enhanced Atomic Layer Deposition of Molybdenum Carbide and Nitride with Bis( *Tert* - Butylimido)Bis(Dimethylamido) Molybdenum. *J. Vac. Sci. Technol. A Vacuum, Surfaces, Film.* **2017**, *35*, 01B141.
- (15) Alevli, M.; Gungor, N. Influence of N<sub>2</sub>/H<sub>2</sub> and N<sub>2</sub> Plasma on Binary III-Nitride Films Prepared by Hollow-Cathode Plasma-Assisted Atomic Layer Deposition. *J. Vac. Sci. Technol. A Vacuum, Surfaces, Film.* **2018**, *36*, 01A110.
- (16) Ozgit-Akgun, C.; Goldenberg, E.; Okyay, A. K.; Biyikli, N. Hollow Cathode Plasma-Assisted Atomic Layer Deposition of Crystalline AlN, GaN and Al<sub>x</sub>Ga<sub>1-x</sub>N Thin Films at Low Temperatures. *J. Mater. Chem. C* **2014**, *2*, 2123–2136.
- (17) Kim, H.; Kellock, A. J.; Rossnagel, S. M. Growth of Cubic-TaN Thin Films by Plasma-Enhanced Atomic Layer Deposition. *J. Appl. Phys.* **2002**, *92*, 7080–7085.
- (18) Kim, H.; Detavernier, C.; Van Der Straten, O.; Rossnagel, S. M.; Kellock, A. J.; Park, D. G. Robust TaN<sub>x</sub> Diffusion Barrier for Cu-Interconnect Technology with Subnanometer Thickness by Metal-Organic Plasma-Enhanced Atomic Layer Deposition. *J. Appl. Phys.* **2005**, *98*, 014308.
- (19) Han, J. H.; Kim, H. Y.; Lee, S. C.; Kim, D. H.; Park, B. K.; Park, J. S.; Jeon, D. J.; Chung, T. M.; Kim, C. G. Growth of Tantalum Nitride Film as a Cu Diffusion Barrier by Plasma-Enhanced Atomic Layer Deposition from Bis((2-(Dimethylamino)Ethyl)(Methyl)Amido)Methyl(Tert-Butylimido)Tantalum Complex. *Appl. Surf. Sci.* **2016**, *362*, 176–181.

- (20) Huotari, H.; Haukka, S.; Matero, R.; Rahtu, A.; Tois, E.; Tuominen, M. Atomic Layer Deposition of NbN and Nb(Si)N for Metal Electrodes. In *ECS Transactions*; ECS, 2006; Vol. 1, pp 131–135.
- (21) Sowa, M. J.; Yemane, Y.; Zhang, J.; Palmstrom, J. C.; Ju, L.; Strandwitz, N. C.; Prinz, F. B.; Provine, J. Plasma-Enhanced Atomic Layer Deposition of Superconducting Niobium Nitride. *J. Vac. Sci. Technol. A Vacuum, Surfaces, Film.* **2017**, 35, 01B143.
- (22) Kim, J. Y.; Seo, S.; Kim, D. Y.; Jeon, H.; Kim, Y. Remote Plasma Enhanced Atomic Layer Deposition of TiN Thin Films Using Metalorganic Precursor. *J. Vac. Sci. Technol. A Vacuum, Surfaces, Film.* **2004**, 22, 8–12.
- (23) Kim, J. Y.; Kim, D. Y.; Park, H. O.; Jeon, H. Characteristics and Compositional Variation of TiN Films Deposited by Remote PEALD on Contact Holes. *J. Electrochem. Soc.* **2005**, 152, G29.
- (24) Kim, E.-J.; Kim, D.-H. Highly Conductive HfNx Films Prepared by Plasma-Assisted Atomic Layer Deposition. *Electrochem. Solid-State Lett.* **2006**, 9, C123.
- (25) Alevli, M.; Ozgit, C.; Donmez, I.; Biyikli, N. The Influence of N<sub>2</sub>/H<sub>2</sub> and Ammonia N Source Materials on Optical and Structural Properties of AlN Films Grown by Plasma Enhanced Atomic Layer Deposition. *J. Cryst. Growth* **2011**, 335, 51–57.
